# Supplementary material for: Structure-based Inhibitor Design for the Intrinsically Disordered Protein c-Myc
Source: PubMed Central journal article supplement (PMC4773988; doi:10.1038/srep22298), 2016-03-02
Supplement: srep22298-s1.pdf [file srep22298-s1.pdf]

## **Structure-based Inhibitor Design for the Intrinsically Disordered Protein c-Myc**

Chen Yu, Xiaogang Niu, Fan Jin, Zhirong Liu, Changwen Jin, and Luhua Lai

### **Supporting Information**

1. Supplementary Figures 1-9
2. Table S1 Ranks and library IDs of identified hits in virtual screening

## Supplementary Figures 1-9

Figure S1 Circular dichroism (CD) spectra of c-Myc<sub>370-409</sub> with different compounds.

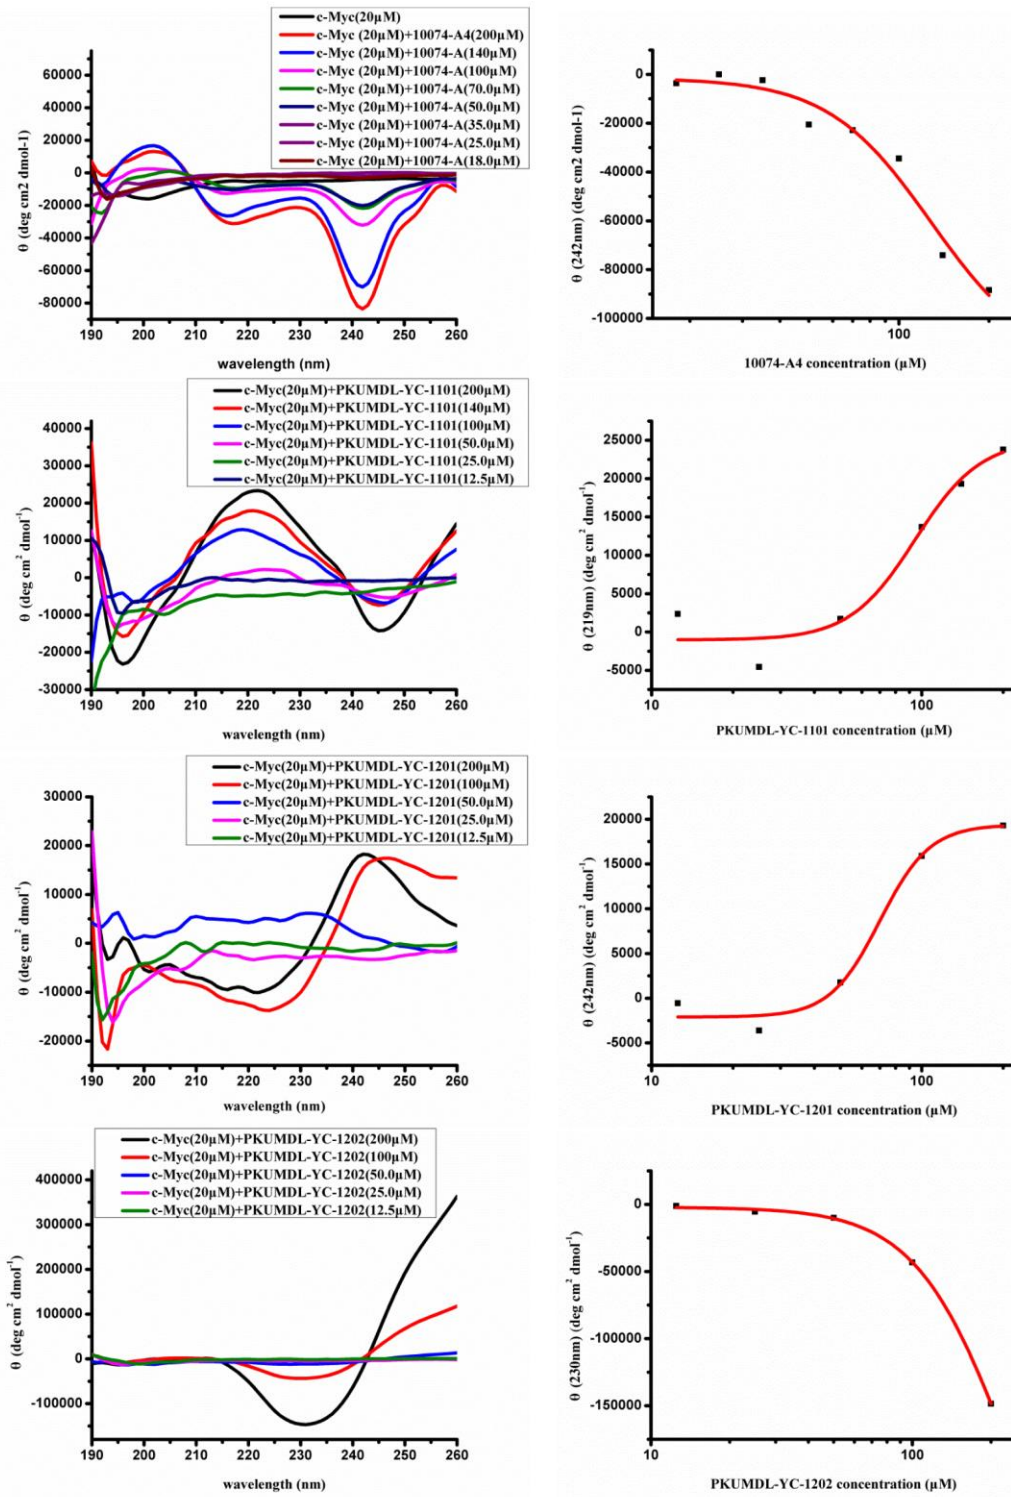

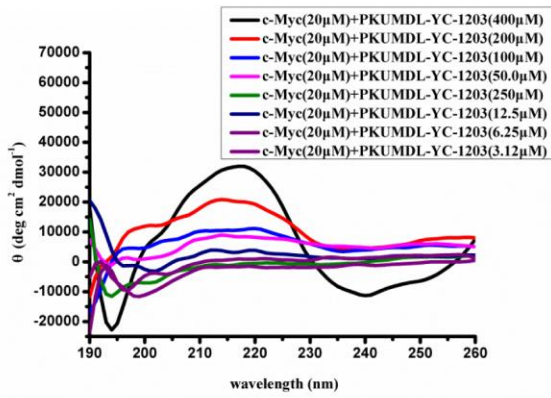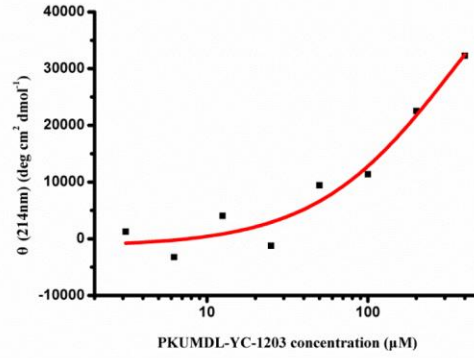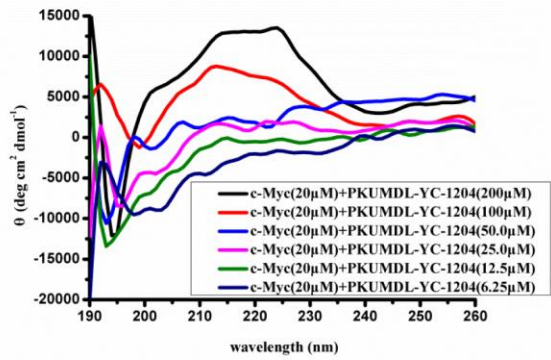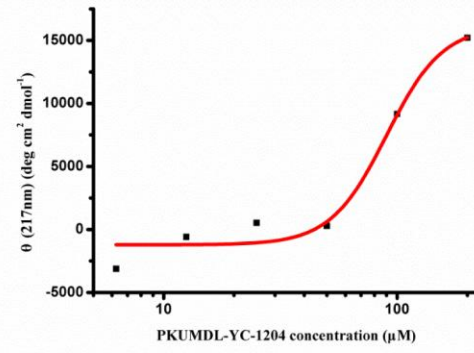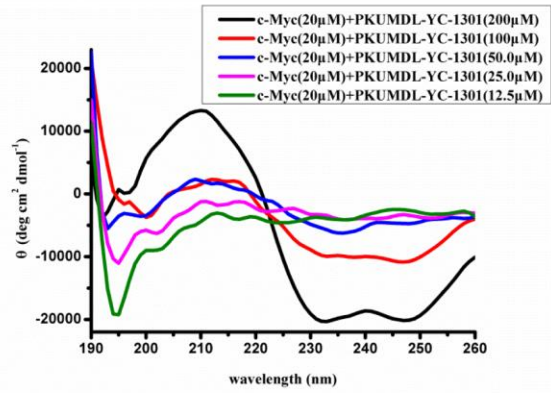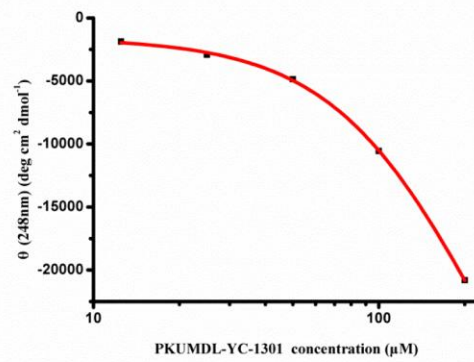

Figure S2 Surface plasmon resonance (SPR) assay results of different compounds.

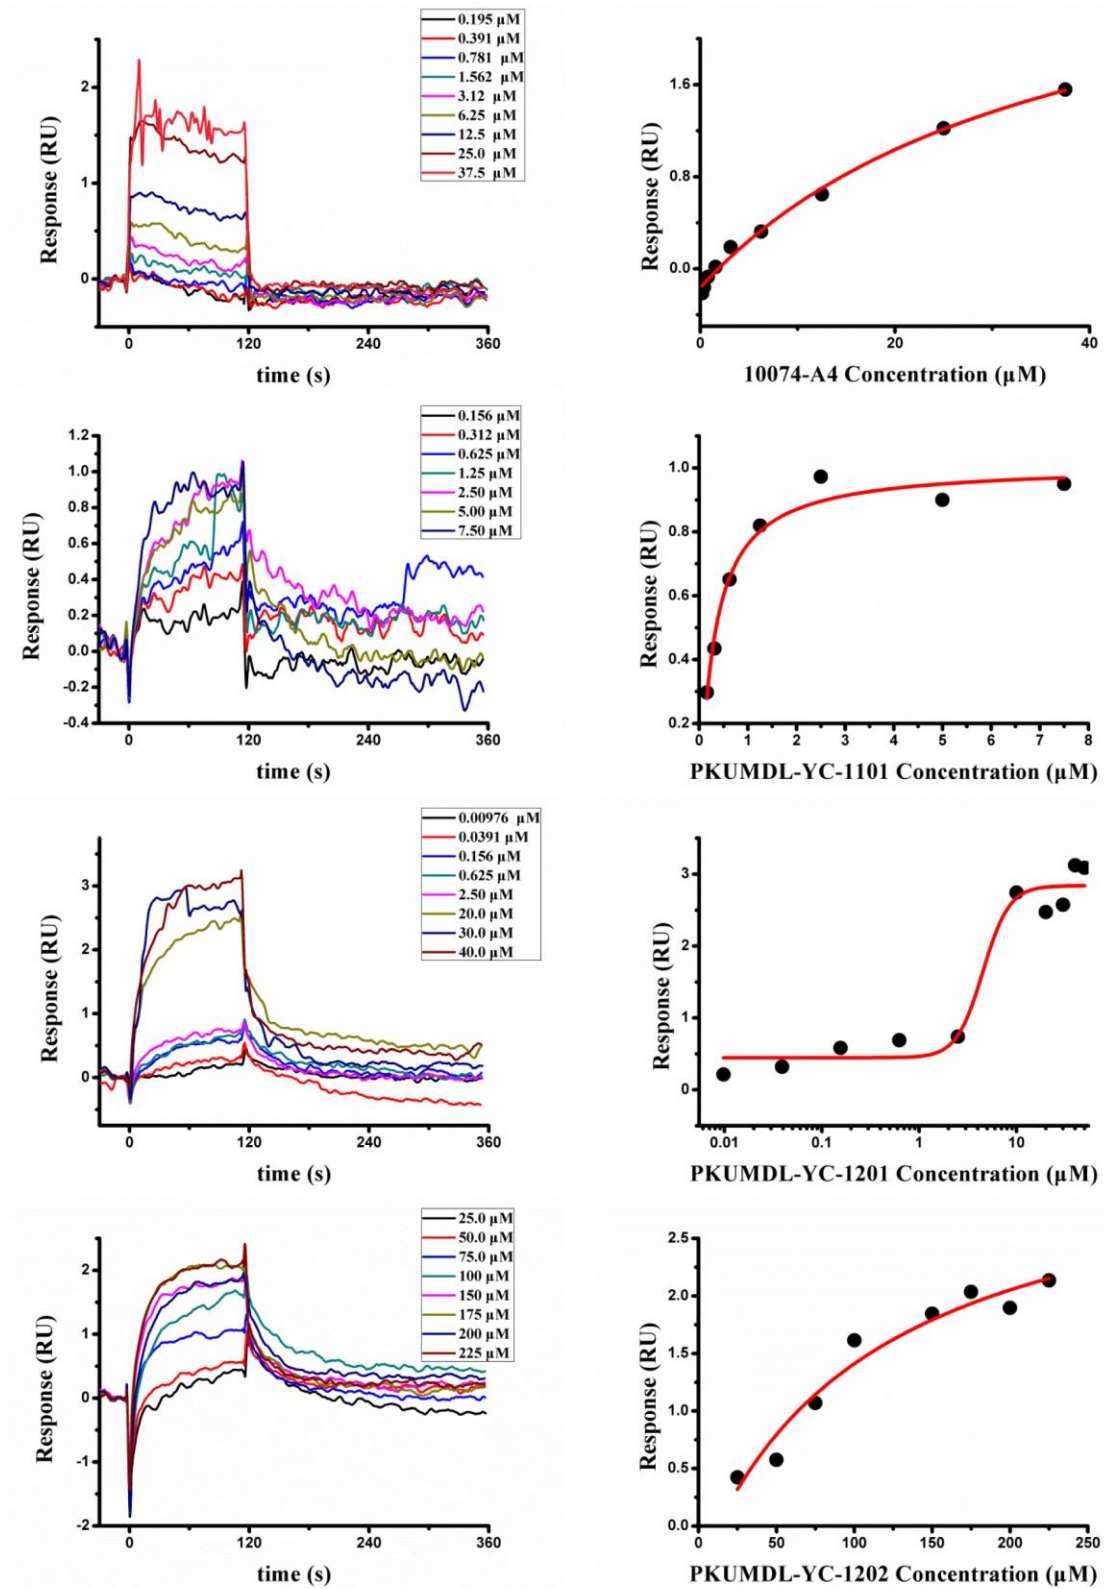

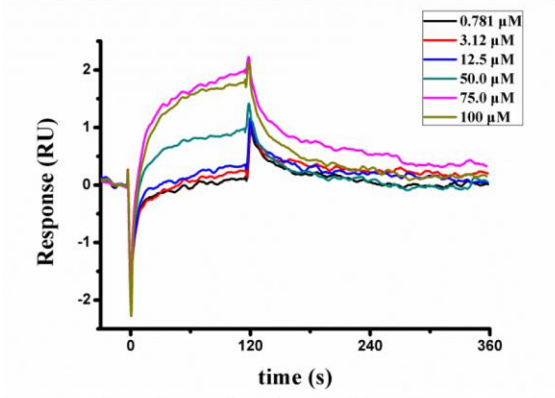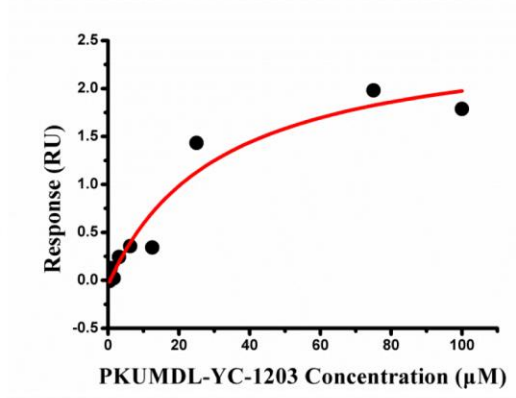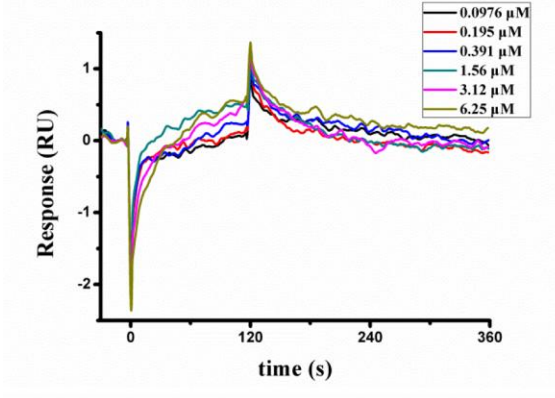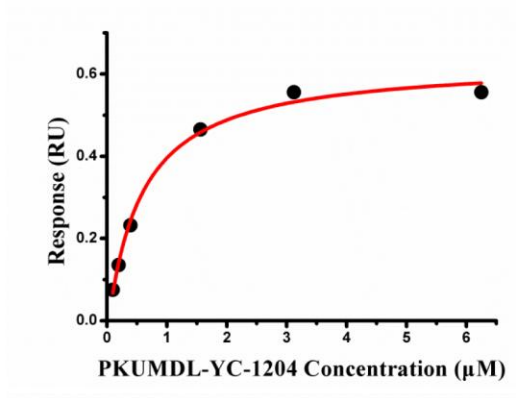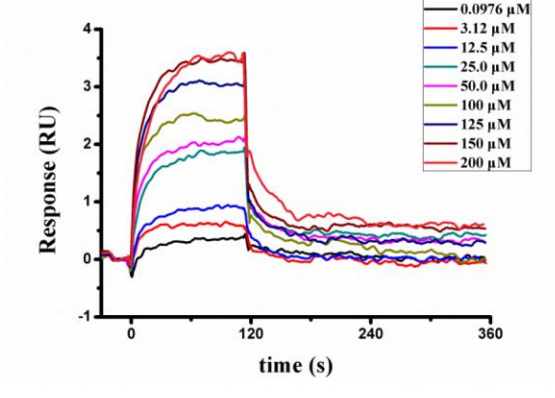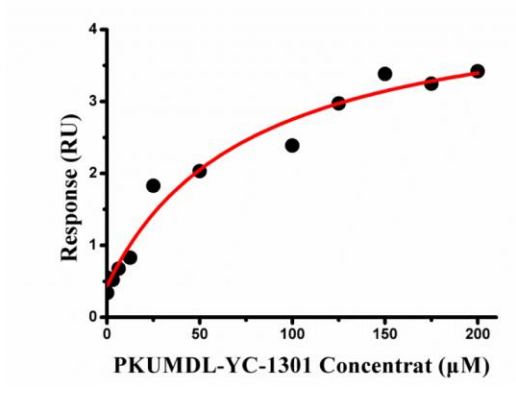

**Figure S3 HL-60 cells growth inhibition of different compounds.** Data represent the mean  $\pm$  standard deviation of three independent experiments.

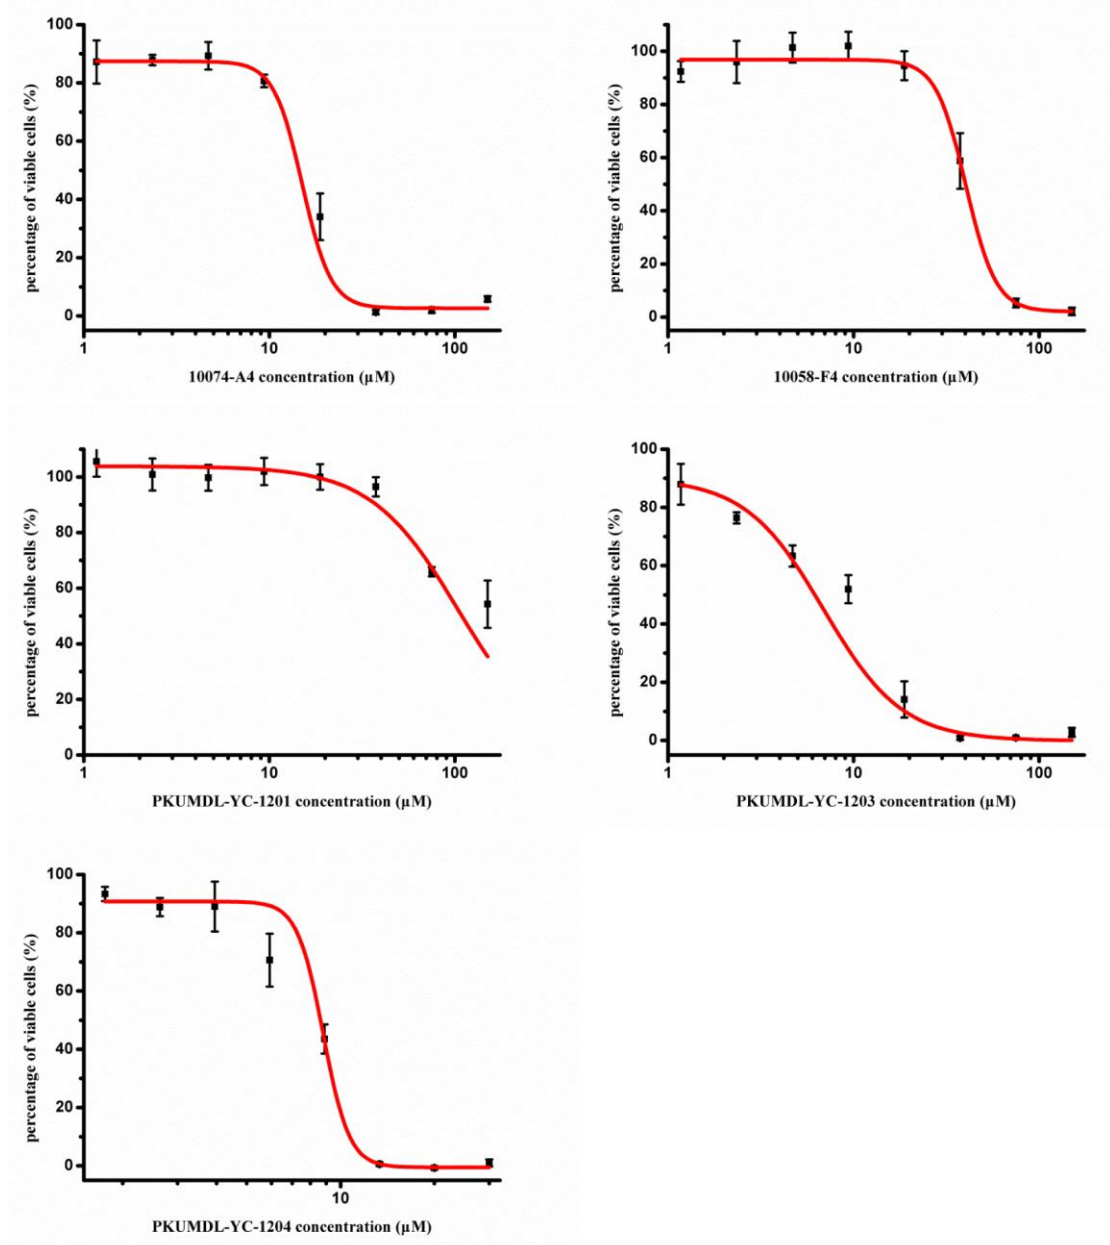

**Figure S4 Compounds changed HL-60 cell cycle.** Data represent the mean  $\pm$  standard

deviation of three independent experiments. \* $p < 0.05$ , \*\* $p < 0.01$ .

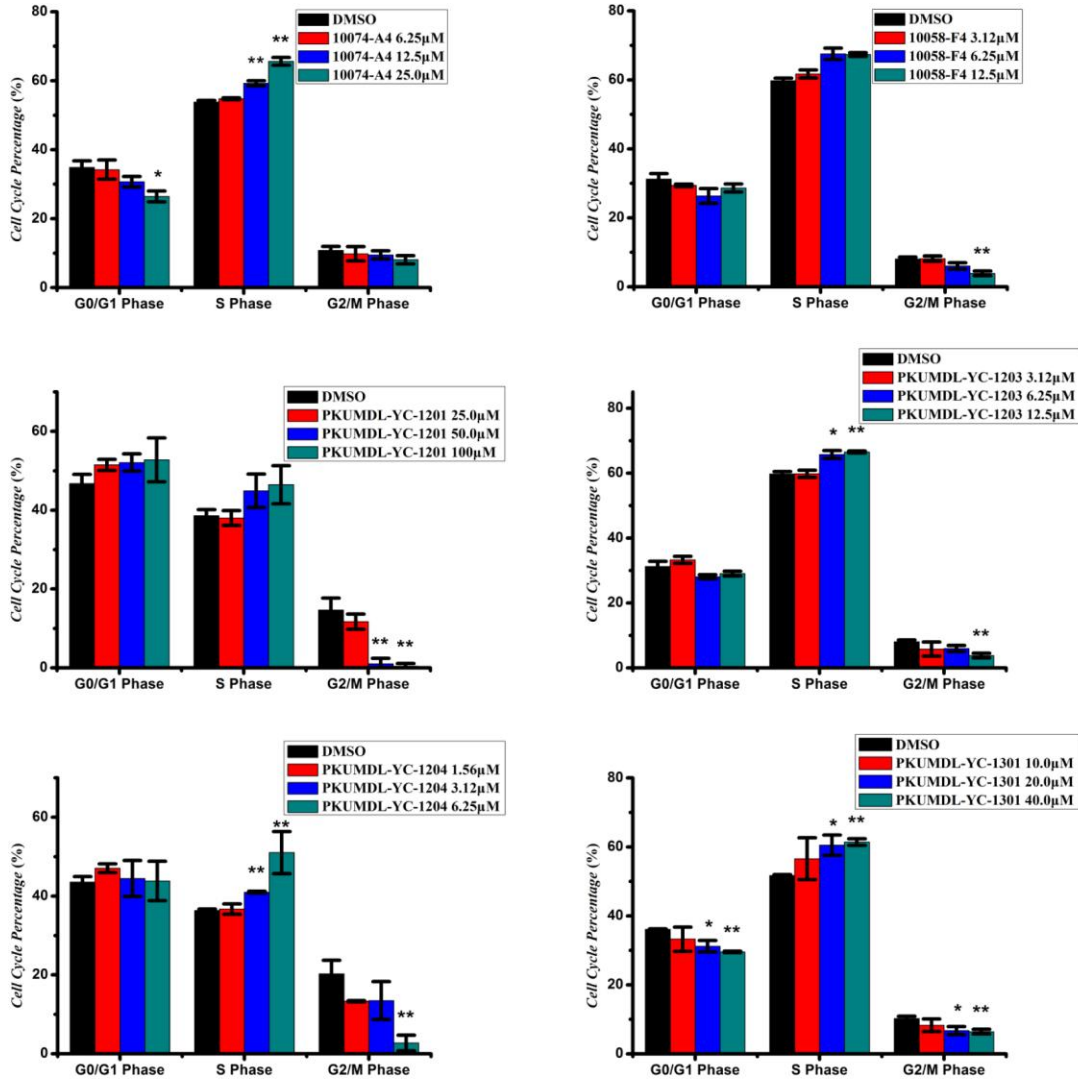



Figure S5 PKUMDL-YC-1205's non-specific binding to GST-Max.

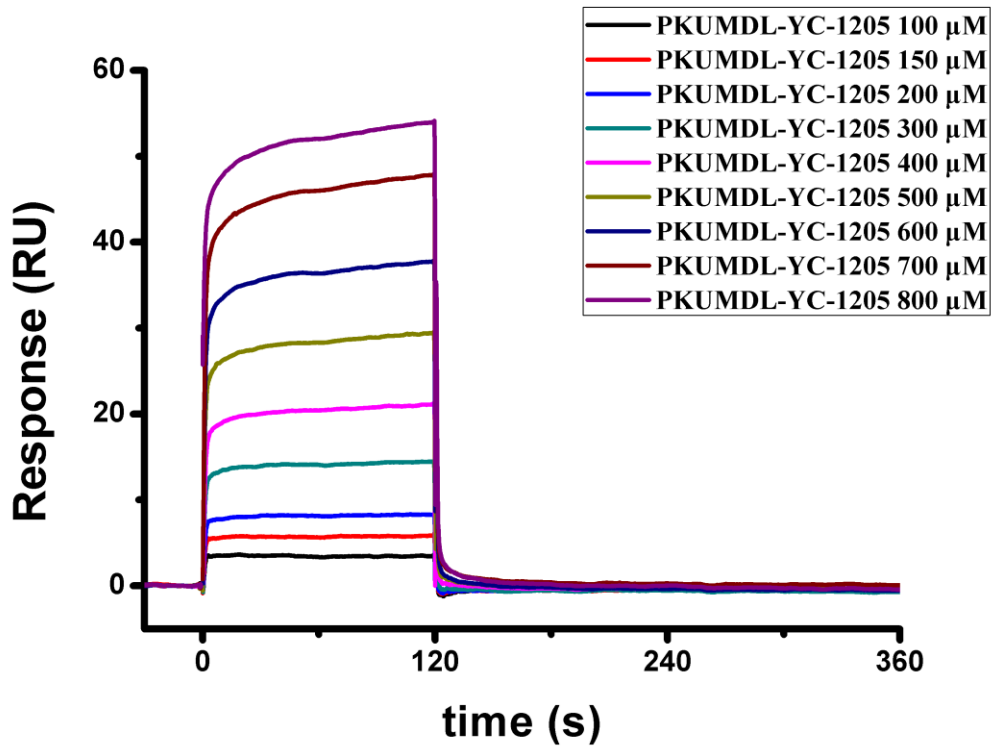

Figure S6 PKUMDL-YC-1205 had no effect on GST dimerization equilibrium. (A)

Chemical cross-linking and anti-GST western blot results. (B) Blackness integrals of GST homodimer percentage are shown as a histogram. Data represent the mean  $\pm$  standard deviation of two independent experiments.

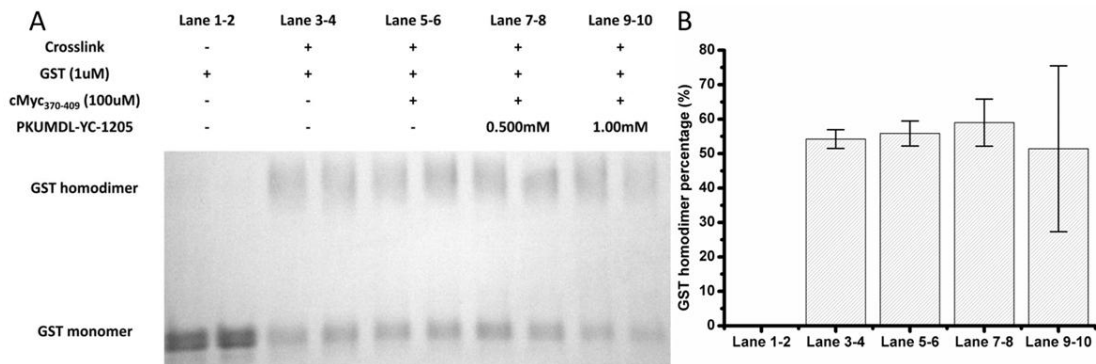

Figure S7 Overlapped  $^1\text{H}$ - $^1\text{H}$  TOCSY spectrum of c-Myc<sub>370-409</sub> with (green) and without (red) PKUMDL-YC-1205.

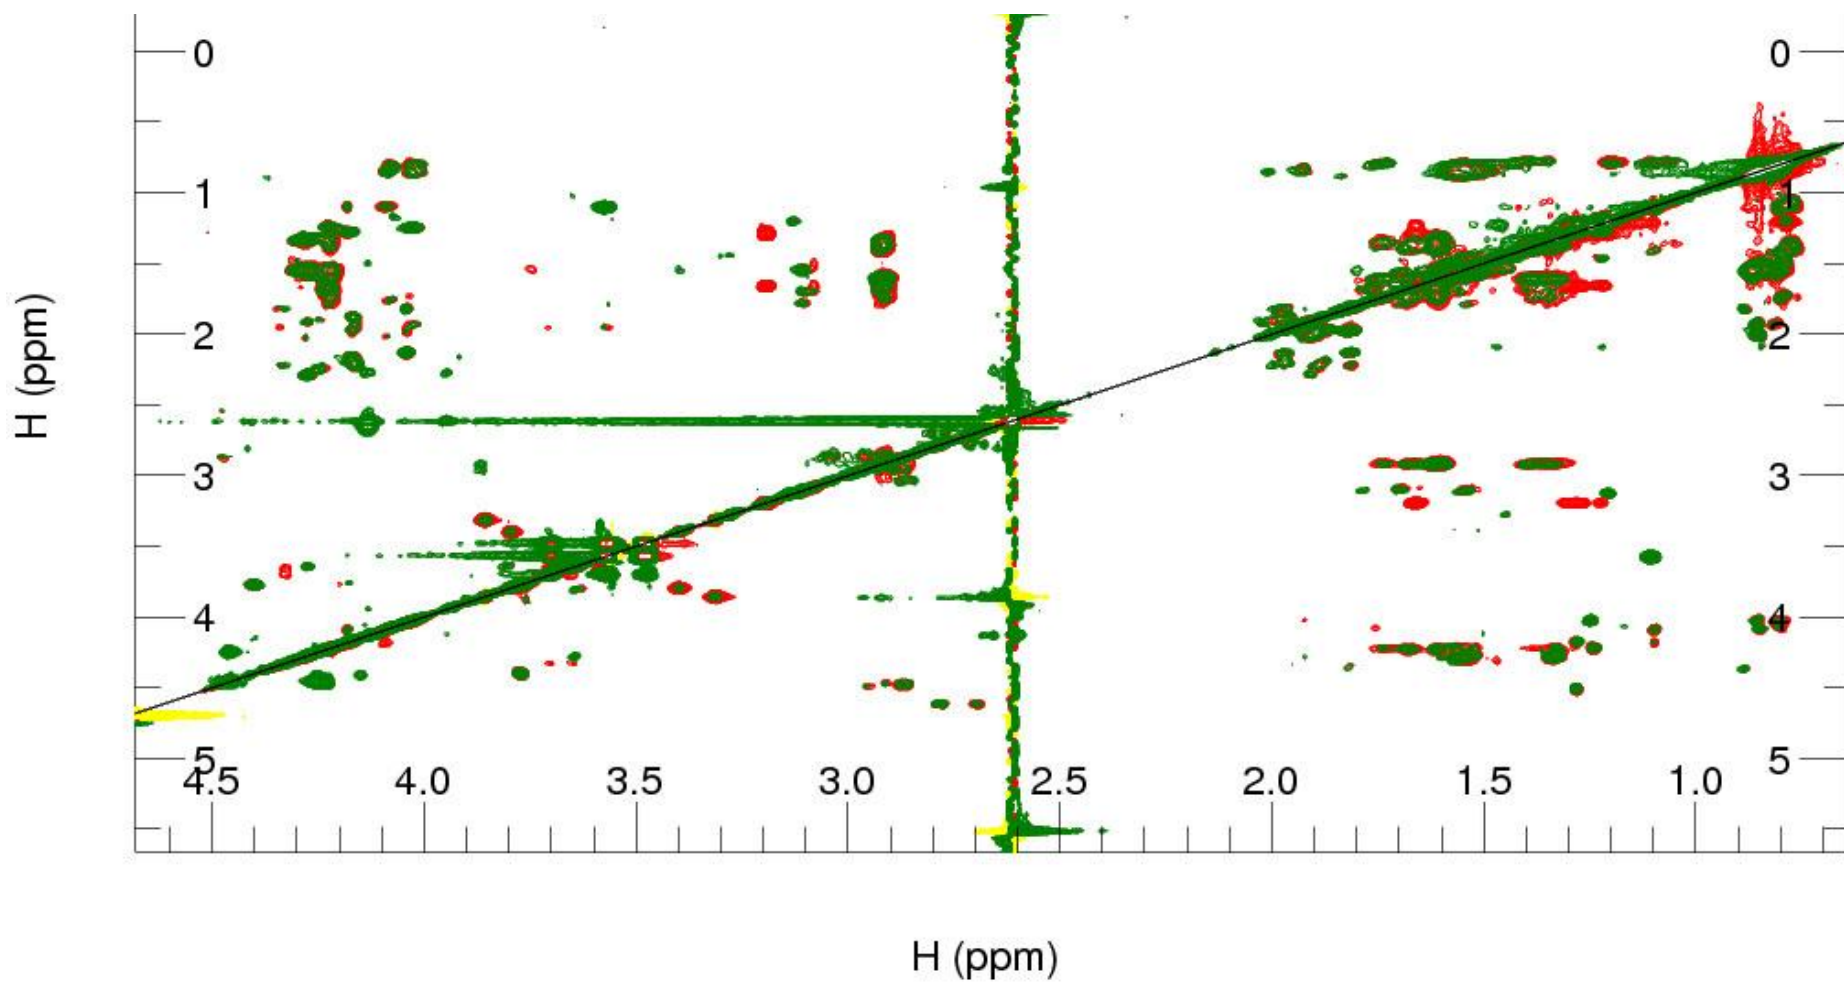

**Figure S8 Interactions between compounds and c-Myc<sub>370-409</sub> in molecular dynamic simulations.** Black squares represent the interactions between PKUMDL-YC-1205 (A), 10074-A4 (S form, B), AJ-292/41944612 (C) and the residues of c-Myc<sub>370-409</sub>. Five independent 100-nanosecond simulations are represented.

**A**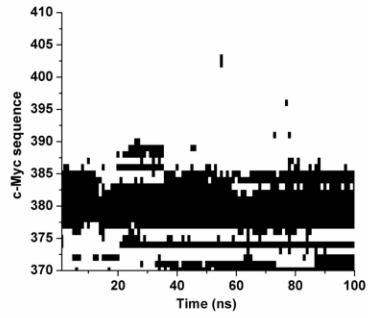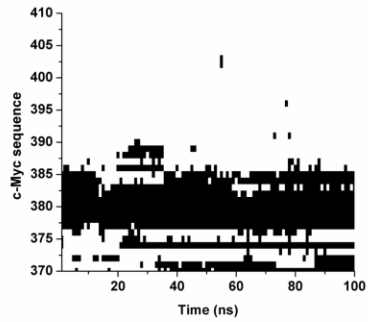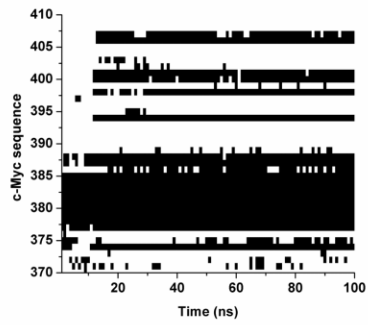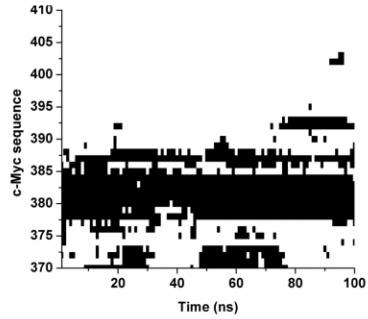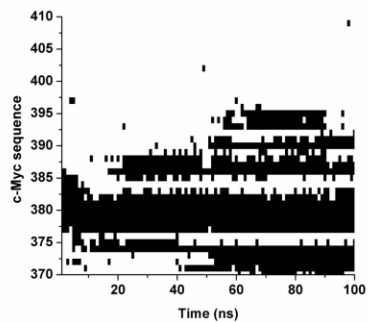**B**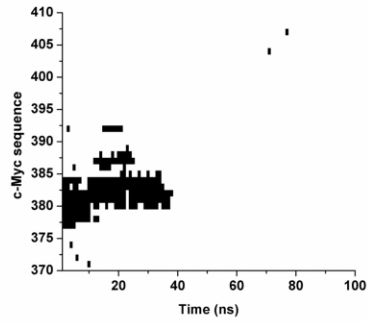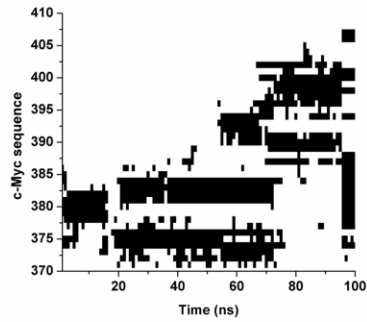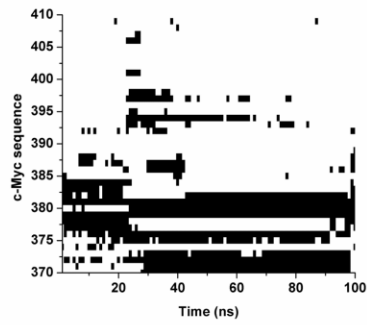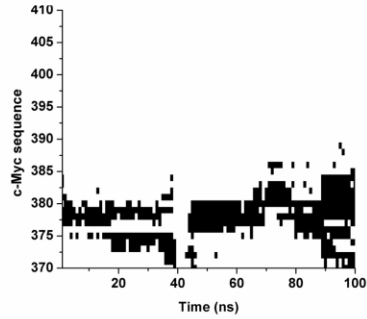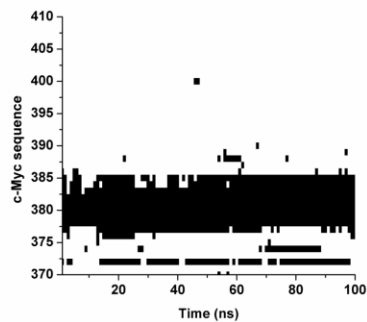**C**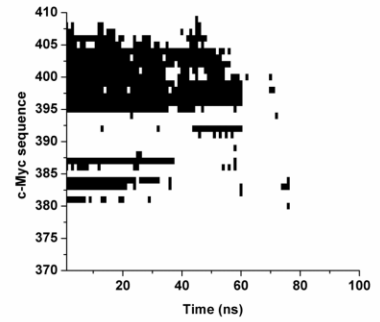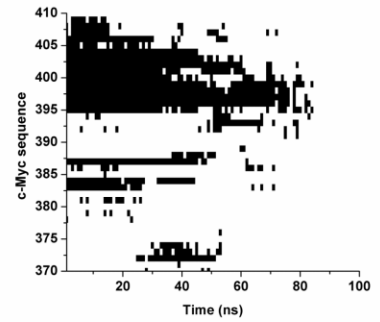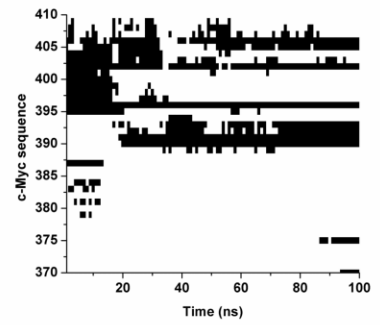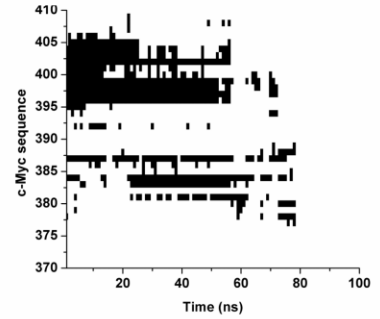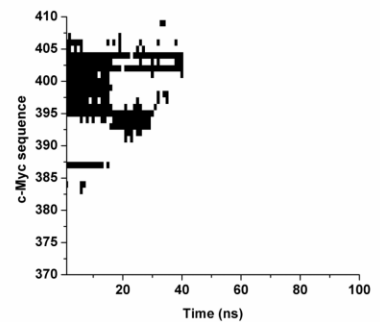

**Figure S9 Docking Modes of Compounds to c-Myc<sub>370-409</sub>.** PKUMDL-YC-1201 (A), PKUMDL-YC-1202 (B), PKUMDL-YC-1203 (C), PKUMDL-YC-1204 (D) are represented in pink and Holo conformation of the c-Myc<sub>370-409</sub> is represented in green.

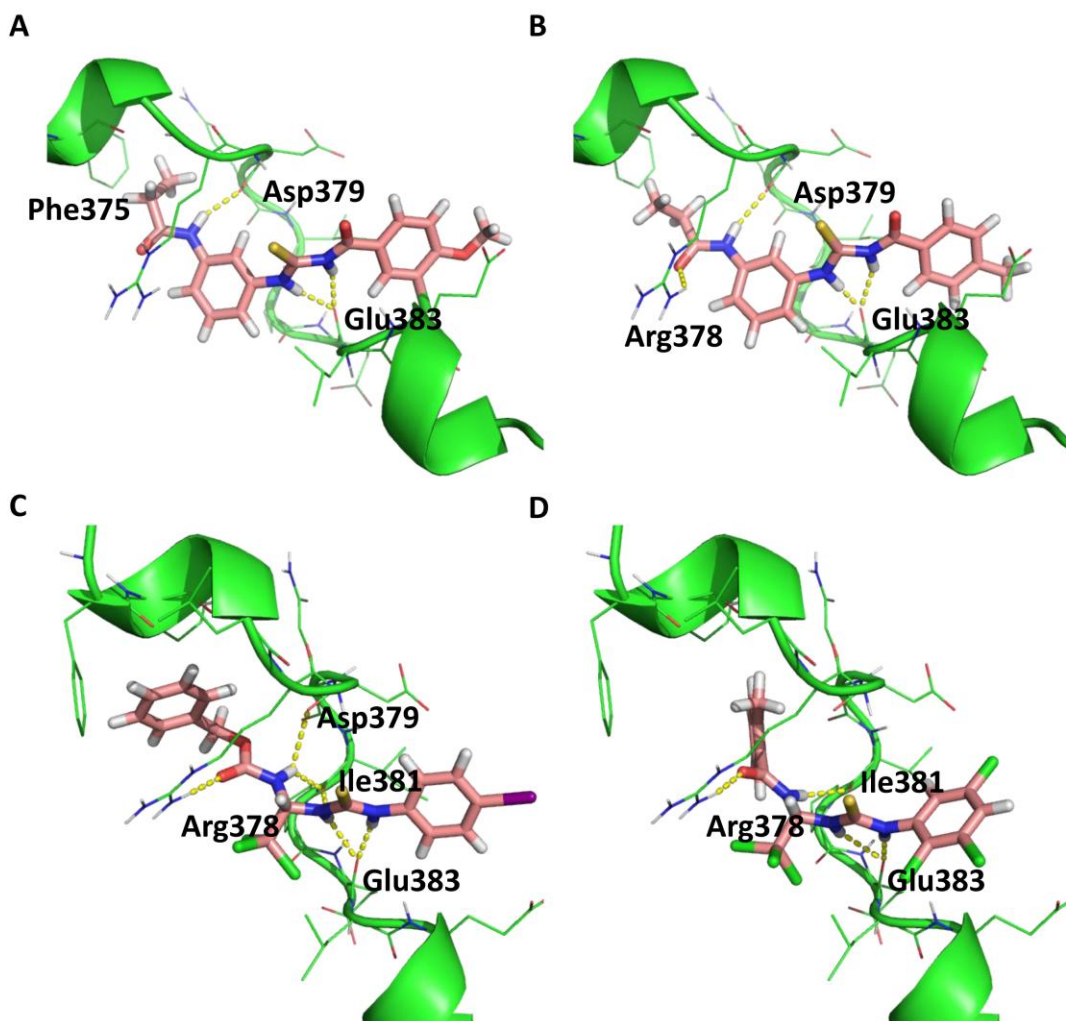

**Table S1 Ranks and library IDs of identified hits in virtual screening**

SPECS library: 197,211 compounds

DCSD library: 4,728 compounds

Total: 201,939 compounds

| <b>Compound</b>       | <b>Cavity</b>             | <b>Rank</b> | <b>Library ID</b>      |
|-----------------------|---------------------------|-------------|------------------------|
| <b>PKUMDL-YC-1101</b> | <b>Apo1</b>               | <b>6</b>    | <b>AG-205/36494016</b> |
| <b>PKUMDL-YC-1201</b> | <b>Holo1</b>              | <b>19</b>   | <b>AG-690/15430337</b> |
| <b>PKUMDL-YC-1202</b> | <b>Holo1</b>              | <b>5</b>    | <b>AG-690/15430703</b> |
| <b>PKUMDL-YC-1203</b> | <b>Holo1</b>              | <b>63</b>   | <b>AG-690/33250021</b> |
| <b>PKUMDL-YC-1204</b> | <b>Holo1</b>              | <b>51</b>   | <b>AH-034/07821020</b> |
| <b>PKUMDL-YC-1205</b> | <b>Holo1</b>              | <b>32</b>   | <b>DCSD002857</b>      |
| <b>PKUMDL-YC-1301</b> | <b>Analog of 10074-A4</b> | <b>9</b>    | <b>AH-487/41976595</b> |
